# Supplementary material
Source: Springer Nature journal article supplement (https://www.springermedizin.de/resource/supplementary/12872_2010_328_MOESM3_ESM.pdf/9429710)

**A**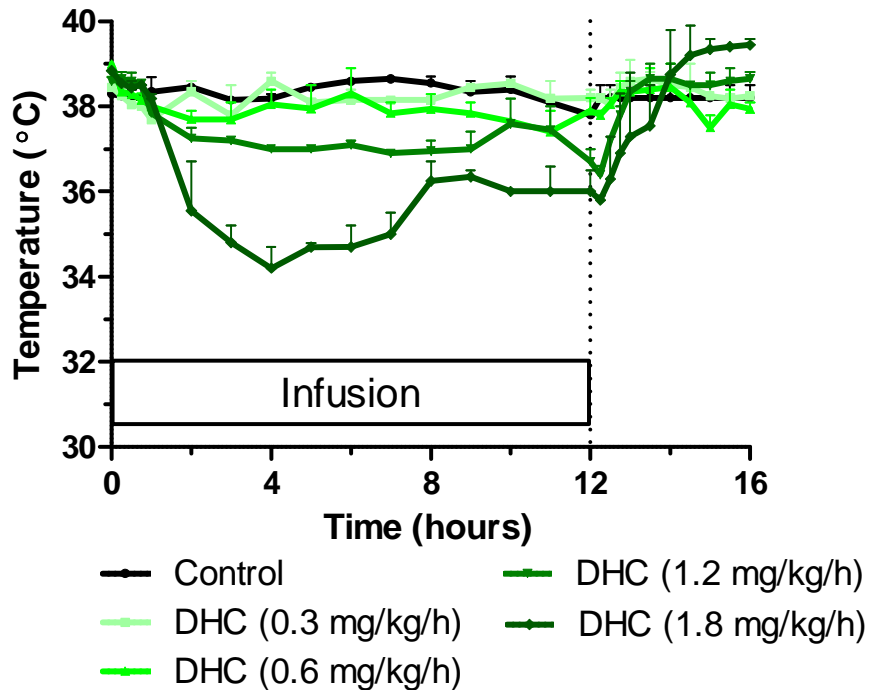**B**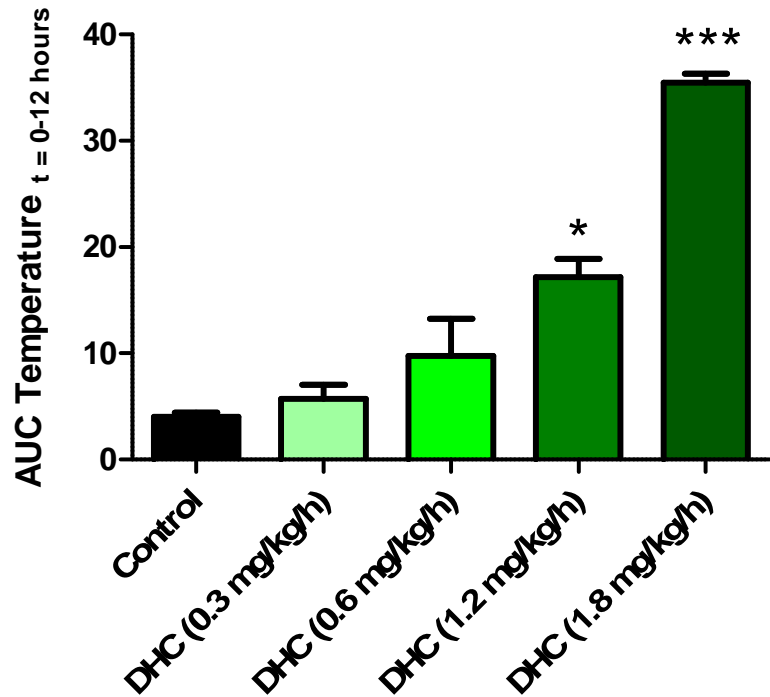

Supplement: MOESM3 [file 9429710]
